# Supplementary material
Source: MDPI journal article supplement (https://www.mdpi.com/2071-1050/15/14/10866)
Supplement: s1 [file sustainability-2470898-supplementary.pdf › sustainability-2470898-supplementary.pdf]

**Table S1.** SVI in the census tracts and adjacent census tracts where the most heat-vulnerable bus stops are located

( ): Average percentage score of Knox County

| GEOID<br>(FIPS) | Bus stop<br>ID                                                                 | Cardinal<br>points                           | EP_POV150<br>(24.1) | EP_UNEMP<br>(4.4) | EP_NOHSDP<br>(8.4) | EP_AGE65<br>(15.5) | EP_AGE17<br>(20.6) | EP_DISABL<br>(12.2) | EP_MINRTY<br>(19.2) | EP_AFAM<br>(9.7) | EP_NOVEH<br>(5.9) | EP_GROUPQ<br>(3.0) |
|-----------------|--------------------------------------------------------------------------------|----------------------------------------------|---------------------|-------------------|--------------------|--------------------|--------------------|---------------------|---------------------|------------------|-------------------|--------------------|
| 47093000902     | 2644                                                                           | C (Univ. of<br>TN)                           | 83.1                | 6.0               | 11.8               | 0.1                | 0.3                | 4.5                 | 9.6                 | 6.3              | 50.0              | 84.6               |
| 47093001500     | 1347                                                                           | NE                                           | 30.3                | 5.0               | 6.7                | 10.9               | 15.9               | 13.3                | 26.5                | 11.5             | 6.4               | 5.7                |
| 47093001600     | 1908, 1314                                                                     | NE                                           | 25.5                | 5.7               | 14.6               | 31.0               | 13.0               | 19.9                | 14.9                | 10.5             | 21.6              | 3.1                |
| 47093001700     |                                                                                |                                              | 38.7                | 4.2               | 13.9               | 16.1               | 21.9               | 17.6                | 23.2                | 15.6             | 14.7              | 0.5                |
| 47093002200     | 1460                                                                           | S (Island<br>Home)                           | 26.7                | 4.3               | 8.7                | 12.4               | 29.0               | 15.9                | 10.0                | 3.8              | 5.1               | 0.0                |
| 47093002300     | 1137, 1134,<br>1413                                                            | S (Lake<br>Forest)                           | 32.5                | 2.5               | 9.7                | 11.9               | 16.3               | 12.0                | 24.4                | 12.5             | 9.3               | 0.0                |
| 47093002700     | 1554                                                                           | NW                                           | 42.3                | 8.4               | 19.2               | 15.2               | 26.8               | 16.7                | 18.8                | 4.7              | 5.0               | 0.4                |
| 47093002800     |                                                                                |                                              | 58.4                | 4.8               | 23.9               | 9.3                | 29.7               | 15.8                | 55.1                | 36.5             | 11.5              | 0.2                |
| 47093003400     | 1137, 1134,<br>1413                                                            | S (Lake<br>Forest)                           | 15.1                | 3.5               | 5.5                | 19.7               | 15.9               | 16.1                | 9.1                 | 1.1              | 1.6               | 0.0                |
| 47093003700     | 1908, 1314,<br>1484                                                            | NE                                           | 29.2                | 0.6               | 14.9               | 13.7               | 15.7               | 20.9                | 9.9                 | 2.4              | 16.8              | 0.0                |
| 47093003902     | 1248                                                                           | N                                            | 41.0                | 2.5               | 17.5               | 13.3               | 22.2               | 19.8                | 37.7                | 20.5             | 2.7               | 0.0                |
| 47093004100     | 2055, 2057,<br>2058, 2475,<br>1920, 1922,<br>1921, 1324                        | N<br>(Fountain<br>City)                      | 19.3                | 5.8               | 10.9               | 13.4               | 13.6               | 14.4                | 20.3                | 11.6             | 4.9               | 0.5                |
| 47093004200     | 1913, 1324,<br>1323                                                            | N<br>(Fountain<br>City,<br>Harrill<br>Hills) | 21.0                | 3.9               | 5.0                | 14.1               | 14.0               | 17.7                | 10.8                | 7.9              | 3.1               | 1.0                |
| 47093004300     |                                                                                |                                              | 22.2                | 5.0               | 9.6                | 15.3               | 22.0               | 13.8                | 16.4                | 11.5             | 4.0               | 0.0                |
| 47093004403     | 1595, 1596<br>1599, 1506,<br>2625, 1510,<br>1027, 1020,<br>1229, 1509,<br>1592 | W                                            | 15.2                | 0.0               | 3.4                | 17.6               | 20.5               | 12.2                | 7.6                 | 2.5              | 13.3              | 1.1                |
| 47093004404     |                                                                                |                                              | 18.5                | 0.7               | 4.1                | 17.6               | 16.0               | 11.9                | 22.4                | 3.9              | 2.4               | 4.4                |
| 47093004501     | 2358                                                                           | NW                                           | 31.1                | 5.7               | 10.2               | 11.1               | 14.4               | 6.7                 | 22.8                | 6.6              | 6.5               | 0.0                |
| 47093004615     |                                                                                |                                              | 34.1                | 3.4               | 10.1               | 14.1               | 25.6               | 11.0                | 28.7                | 10.4             | 6.2               | 4.3                |
| 47093004800     | 1248                                                                           | N                                            | 40.5                | 5.7               | 13.4               | 16.3               | 33.7               | 19.3                | 24.1                | 11.2             | 1.6               | 0.0                |
| 47093005000     | 1913, 1324                                                                     | N<br>(Fountain<br>City,                      | 27.3                | 13.4              | 6.6                | 14.7               | 21.6               | 15.8                | 9.1                 | 4.6              | 5.9               | 0.3                |

|             |                  |                                             |      |      |      |      |      |      |      |      |      |      |
|-------------|------------------|---------------------------------------------|------|------|------|------|------|------|------|------|------|------|
|             |                  | Harrill Hills)                              |      |      |      |      |      |      |      |      |      |      |
| 47093005501 | 1701, 2682       | S (Lake Forest, Woodfield Park, Bonny Kate) | 13.8 | 3.1  | 13.8 | 20.0 | 18.0 | 15.7 | 6.7  | 2.2  | 1.2  | 0.0  |
| 47093005603 |                  |                                             | 12.3 | 2.3  | 7.5  | 24.4 | 17.3 | 11.4 | 13.8 | 3.9  | 0.0  | 0.0  |
| 47093005704 | 1545             | W                                           | 17.3 | 3.5  | 2.4  | 14.1 | 17.3 | 6.1  | 17.8 | 0.9  | 2.2  | 0.0  |
| 47093005706 |                  |                                             | 7.8  | 2.2  | 1.1  | 21.6 | 19.6 | 11.8 | 24.3 | 6.6  | 8.3  | 0.0  |
| 47093006600 | 1908, 1314       | NE                                          | 38.5 | 7.9  | 18.2 | 11.1 | 11.2 | 18.9 | 16   | 6.8  | 12.5 | 17.5 |
| 47093006700 | 2197, 2630,      | E                                           | 49.2 | 10.1 | 13.8 | 9.8  | 18.9 | 18.4 | 57.4 | 52.3 | 29.9 | 2.8  |
| 47093006800 | 2164, 2235, 1098 |                                             | 65.5 | 6.3  | 22.8 | 12.6 | 19.8 | 15.7 | 59.9 | 55.2 | 49.2 | 0.8  |
| 47093006901 | 1787, 2644       | C (Univ. of TN)                             | 83.2 | 2.9  | 7.7  | 1.6  | 0.4  | 1.1  | 13.2 | 5.4  | 4.3  | 2.4  |
| 47093006902 |                  |                                             | 78.1 | 4.4  | 0.0  | 0.0  | 1.6  | 2.8  | 18.9 | 7.9  | 0.0  | 42.8 |
| 47093006903 |                  |                                             | 69.7 | 11.4 | 0.0  | 0.0  | 1.1  | 5.1  | 24.5 | 9.8  | 7.4  | 0.0  |
| 47093007000 | 1816, 1817       | NW                                          | 68.7 | 12.7 | 8.9  | 8.4  | 23.4 | 16.3 | 58.1 | 41.5 | 27.7 | 1.9  |
| 47093007100 | 1484             | SW                                          | 11.0 | 2.0  | 0.6  | 20.4 | 22.9 | 6.3  | 10.0 | 1.0  | 1.9  | 0.0  |
